# Supplementary material
Source: PubMed Central journal article supplement (PMC2630082)
Supplement: 0812399106_0812399106SI.pdf [file 0812399106_0812399106SI.pdf]

# Supporting Information

Rauch *et al.* 10.1073/pnas.0812399106

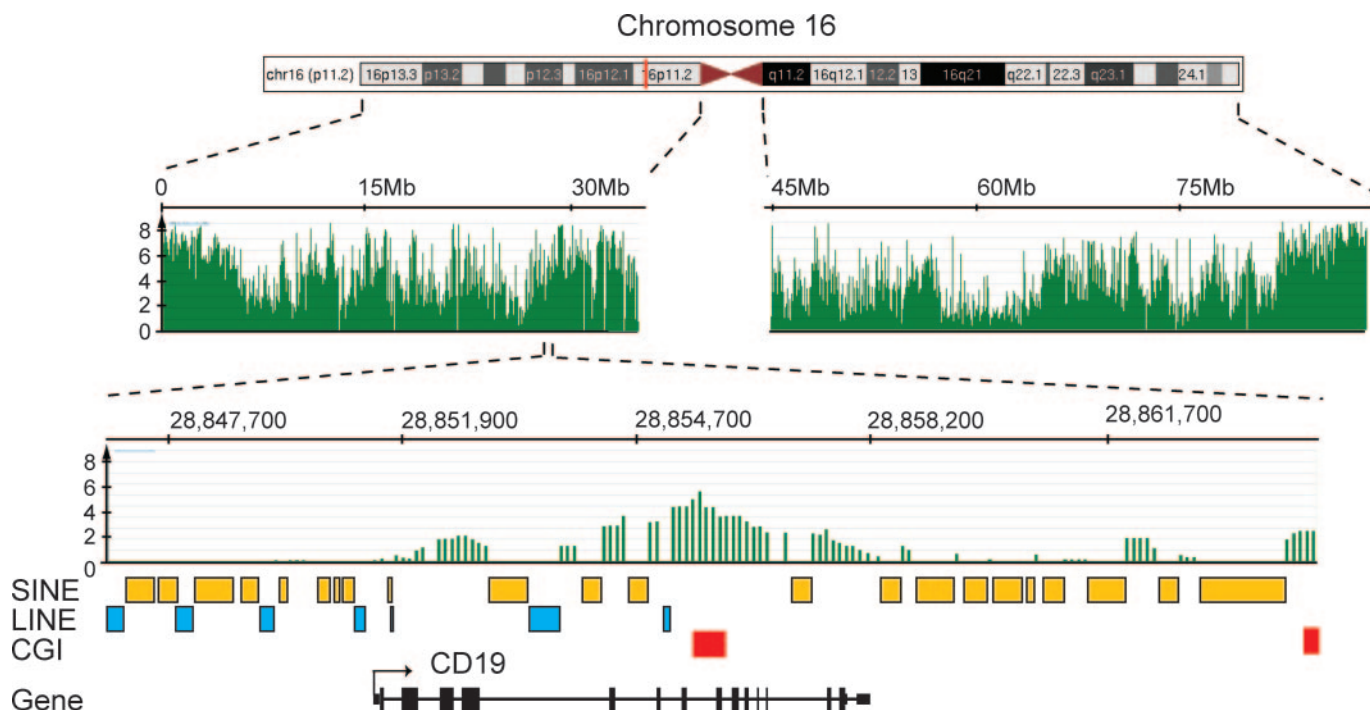

**Fig. S1.** Analysis of CpG methylation at the *CD19* locus on chromosome 16. The *CD19* gene on chromosome 16 was analyzed. The methylation profile is shown plotted along the chromosome as a  $-\log_{10} P$  value score (green). The  $P$  value score was obtained by NimbleScan software and is derived from the Kolmogorov-Smirnov test comparing the  $\log_2$  ratios (MIRA vs. input) within a 750-bp window centered at each probe and the rest of the data on the array. The *CD19* gene, its exons, and the direction of transcription are indicated. SINE and LINE sequences are shown as yellow and blue boxes, respectively. The red boxes show the two CpG islands (CGI) located in this region. The highest methylation signals are seen in the body of the gene and at its 3' end, but methylation is absent at the promoter.

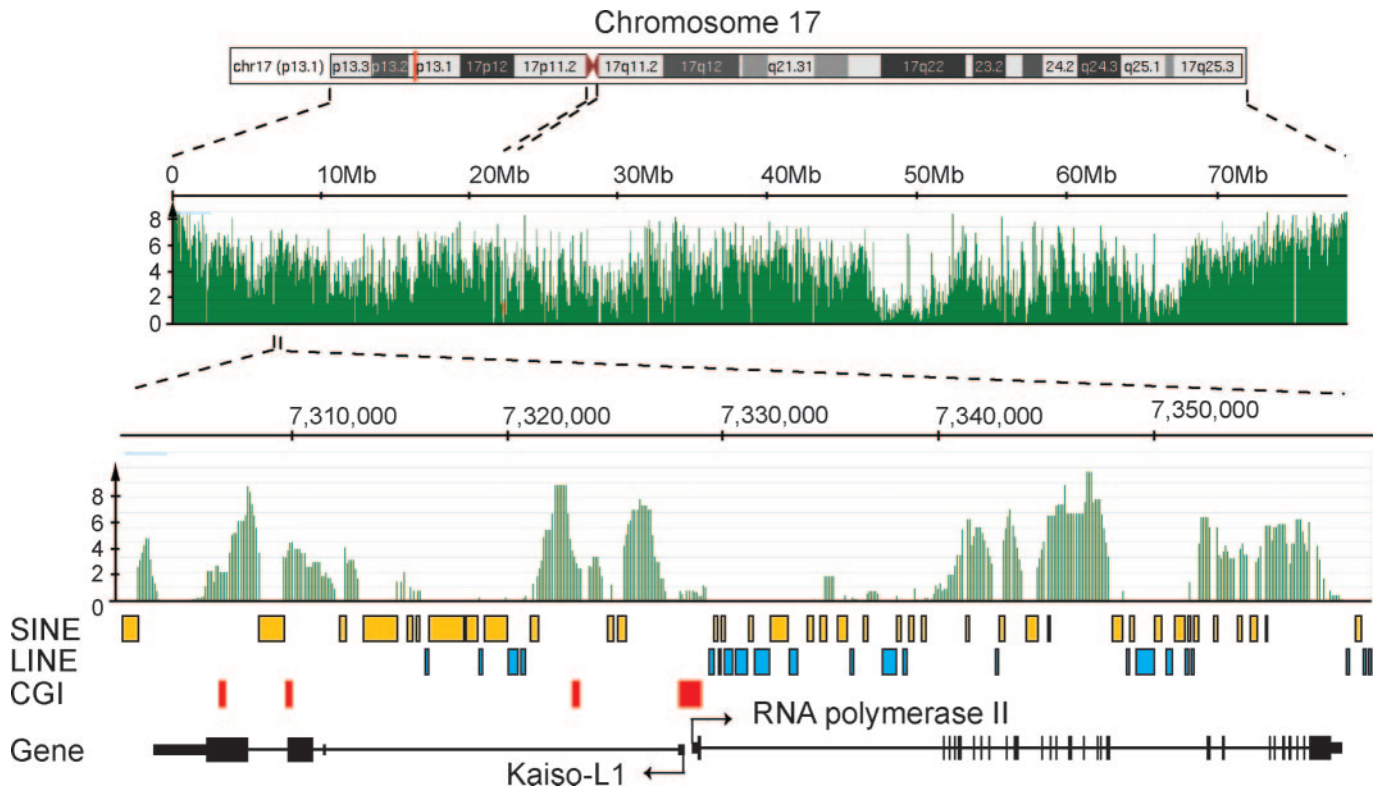

**Fig. S2.** Analysis of CpG methylation at the RNA polymerase II locus on chromosome 17. The RNA polymerase II and Kaiso-L1 genes on chromosome 17 were analyzed. The methylation signal is shown plotted along the chromosome as a  $-\log_{10} P$  value score (green). The 2 genes, their exons, and the directions of transcription are indicated. SINE and LINE sequences are shown as yellow and blue boxes, respectively. The red boxes show CpG islands (CGI). The highest methylation signals are seen in the gene bodies, whereas methylation levels in the bidirectional promoter are low.

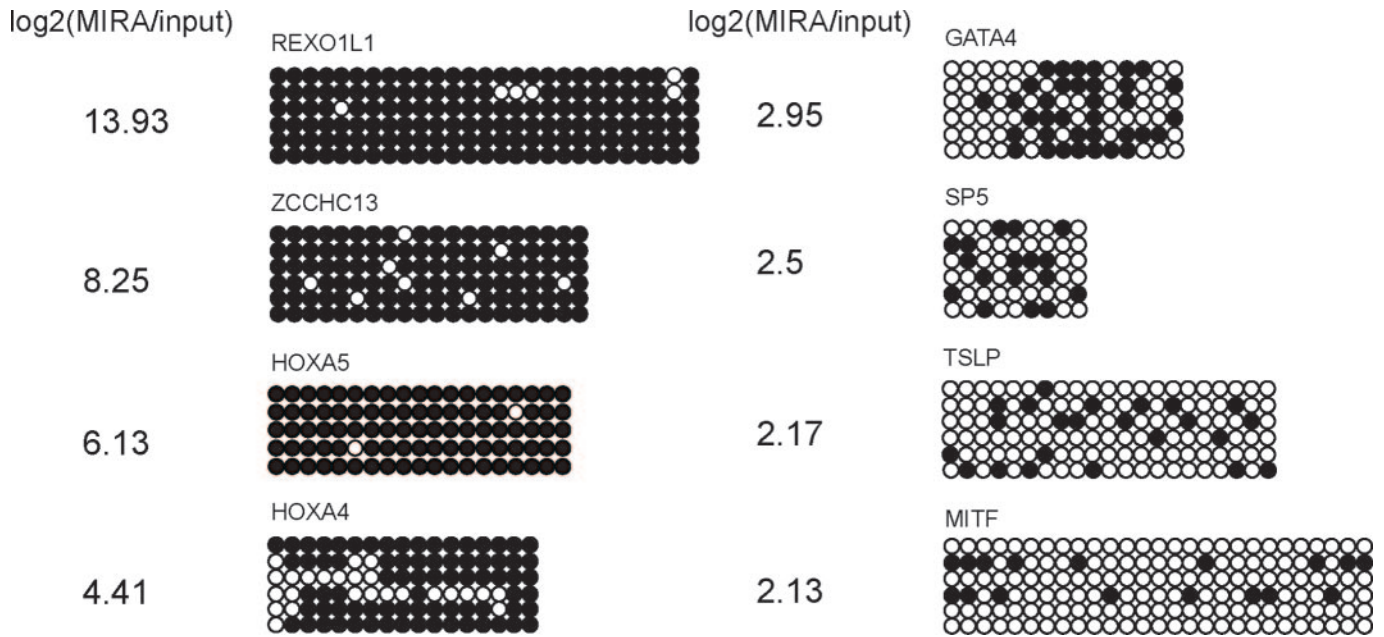

**Fig. S3.** Correlation of array data with bisulfite sequencing data. An enrichment factor representing the signal score of each identified MRI was calculated by averaging the log<sub>2</sub> ratios of MIRA-enriched DNA vs. input DNA of probes within the MRI. Gene promoters overlapping with MRIs showing a range of enrichment factors were chosen at random. Bisulfite sequencing analysis was performed for the gene targets shown. Gene targets with the highest enrichment factors show the densest CpG methylation patterns.

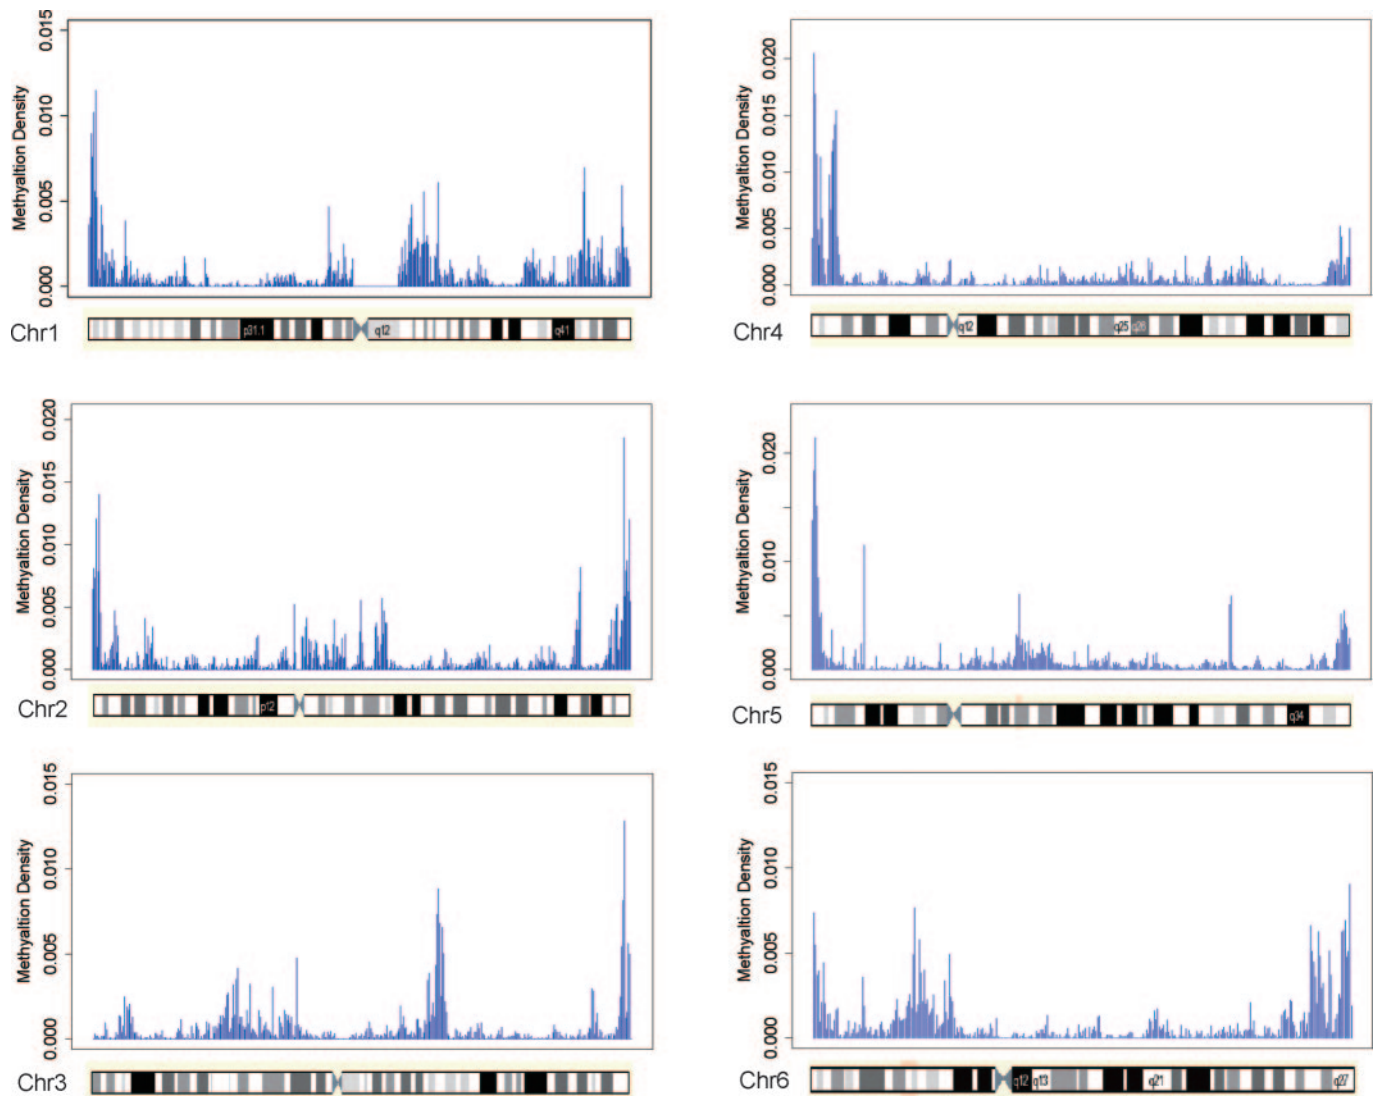

Fig. S4. Methylation patterns along human chromosomes 1–6. Chromosomal methylation density maps are shown for chromosomes 1–6. See main text for details. The chromosome banding pattern was derived from the UCSC Genome Browser.

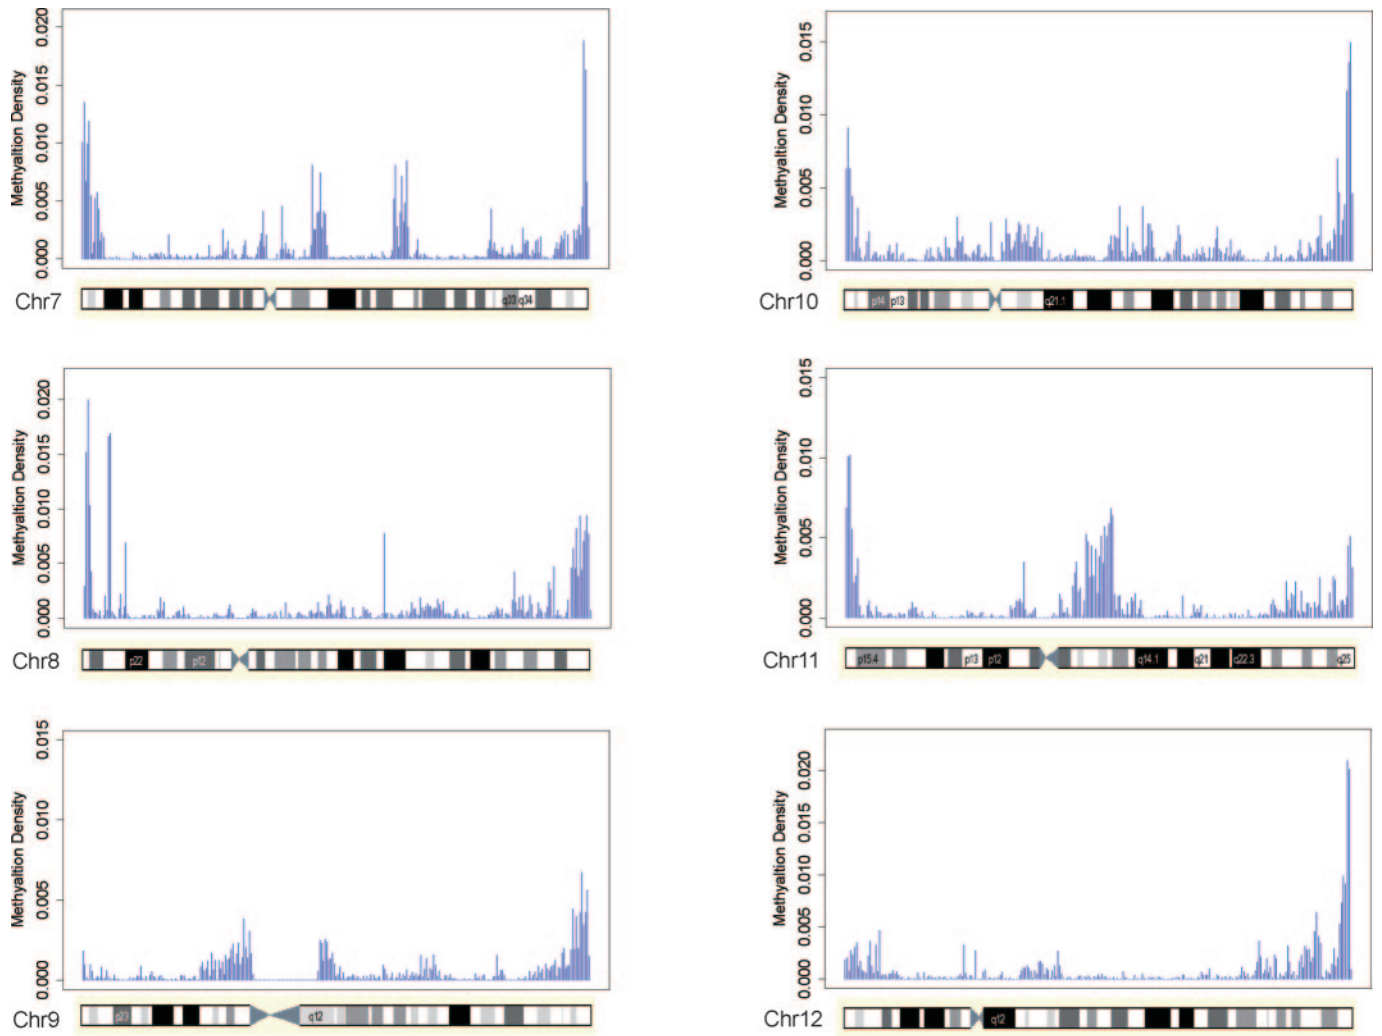

Fig. S5. Methylation patterns along human chromosomes 7–12. Chromosomal methylation density maps are shown for chromosomes 7–12.

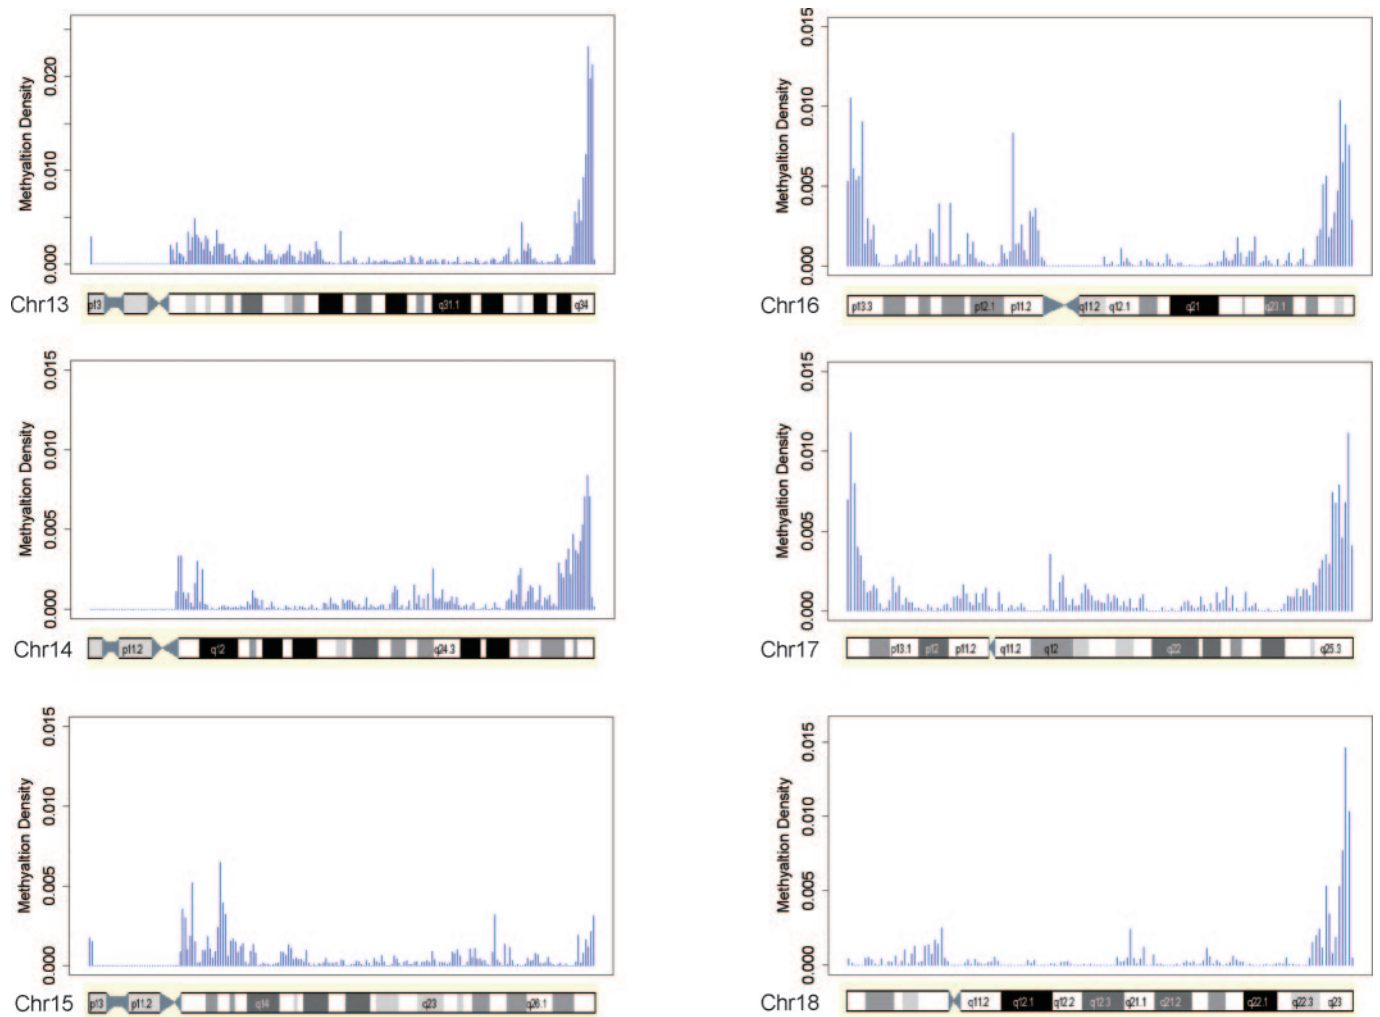

Fig. S6. Methylation patterns along human chromosomes 13–18. Chromosomal methylation density maps are shown for chromosomes 13–18.

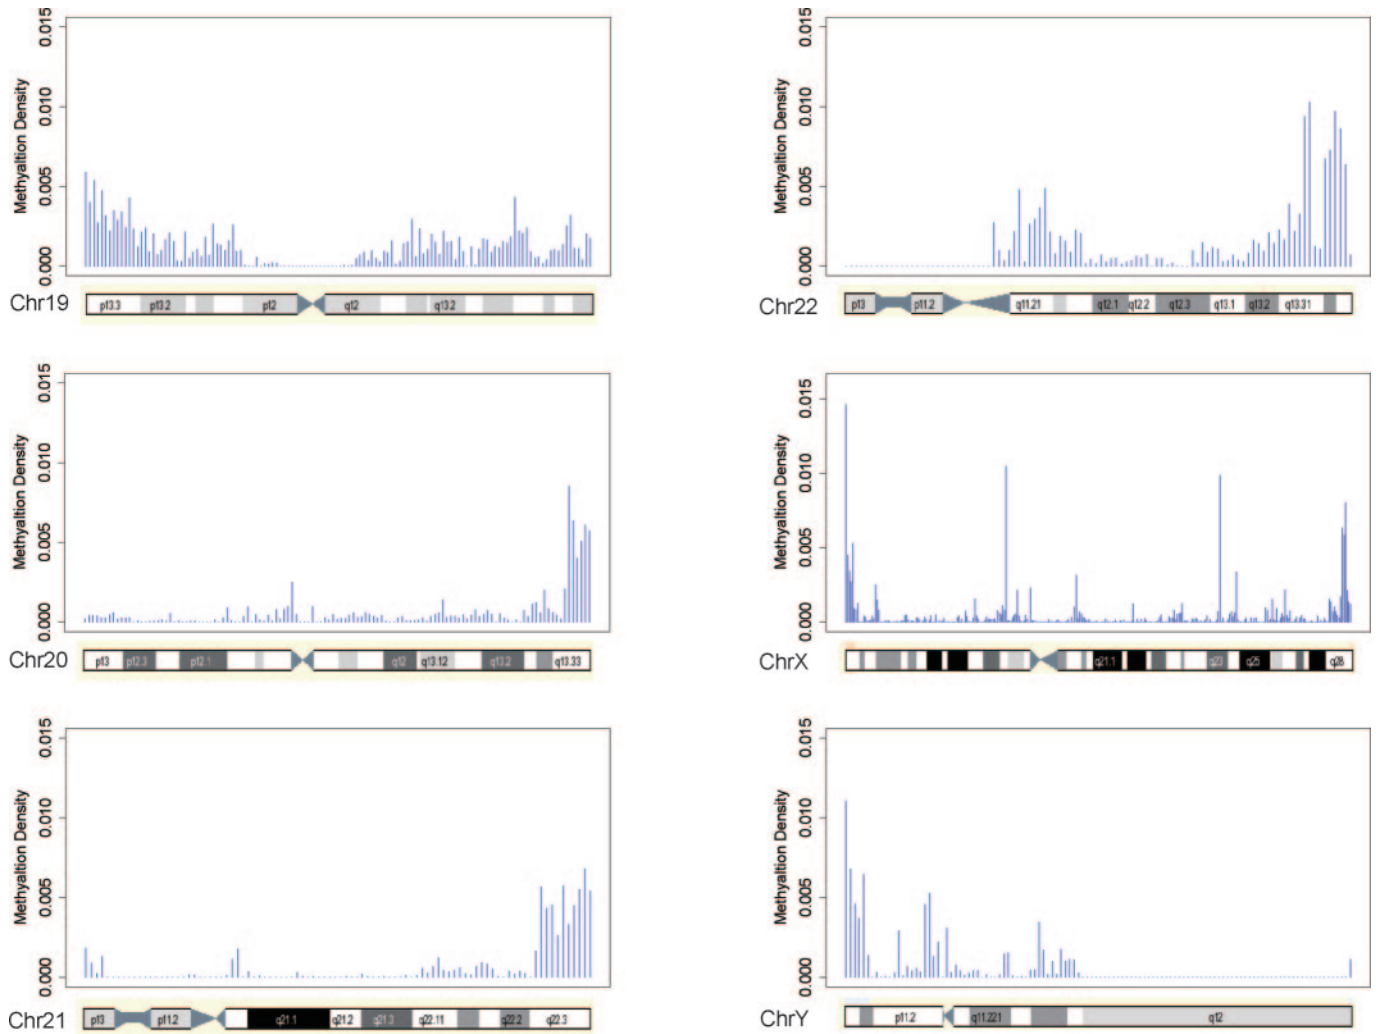

**Fig. S7.** Methylation patterns along human chromosomes 19–22, X, and Y. Chromosomal methylation density maps are shown for chromosomes 19–22, X, and Y. The short arm of chromosome 22 is not covered by probes, owing to a series of tandem repeat structures.

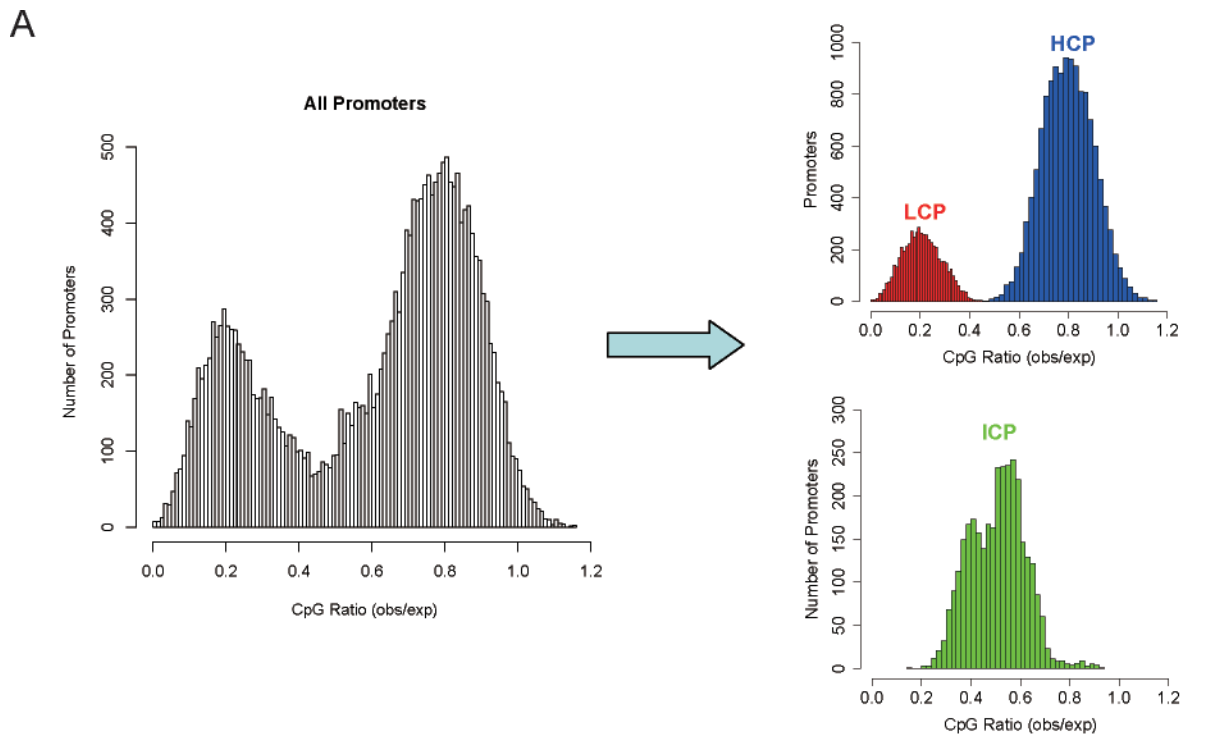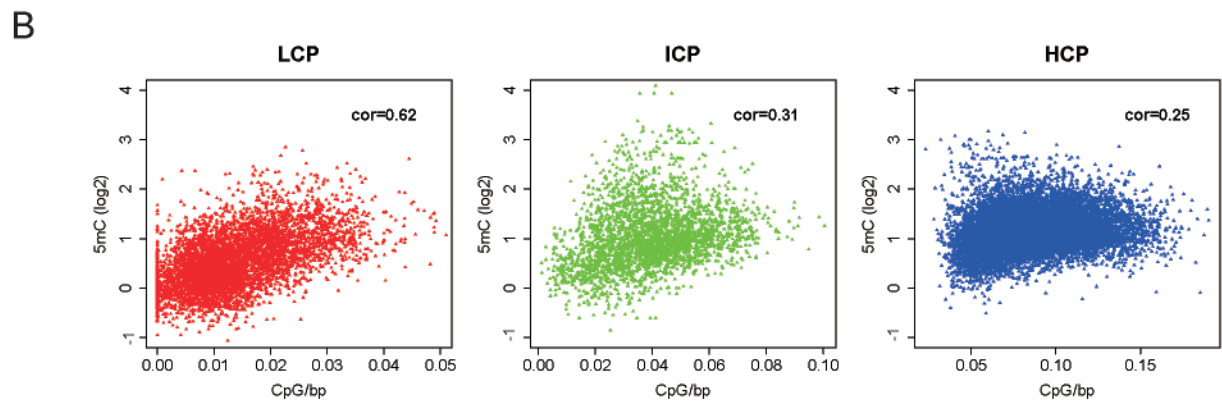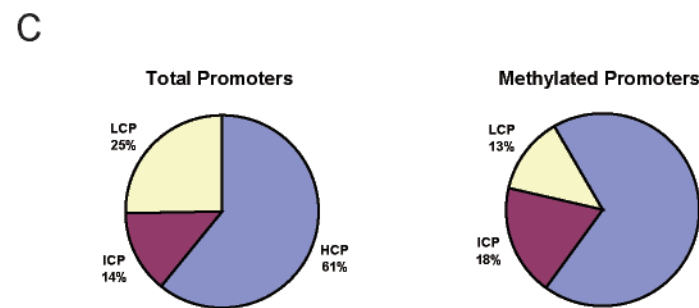

| Promoter Class | Total | Methylated | % Methylated |
|----------------|-------|------------|--------------|
| HCP            | 12850 | 1521       | 11.84%       |
| ICP            | 2951  | 411        | 13.93%       |
| LCP            | 5344  | 293        | 5.48%        |

**Fig. S8.** Levels of DNA methylation in different promoter classes. (A) Promoters were classified according to CpG density as described by Weber *et al.* (2007) *Nature Genet* 39:457–466. Low CpG (LCP), intermediate CpG (ICP), and high CpG (HCP) promoters were defined. (B) The scatterplots show the DNA methylation levels (log<sub>2</sub> of MIRA signals vs. input) for the 3 classes of promoters. Each spot represents 1 promoter. (C and D). The pie charts and table show the relative frequency of the promoter classes among all promoters and methylated promoters, the latter being defined as overlapping an MRI (see main text for definition). ICP and HCP promoters are overrepresented among the methylated promoters.



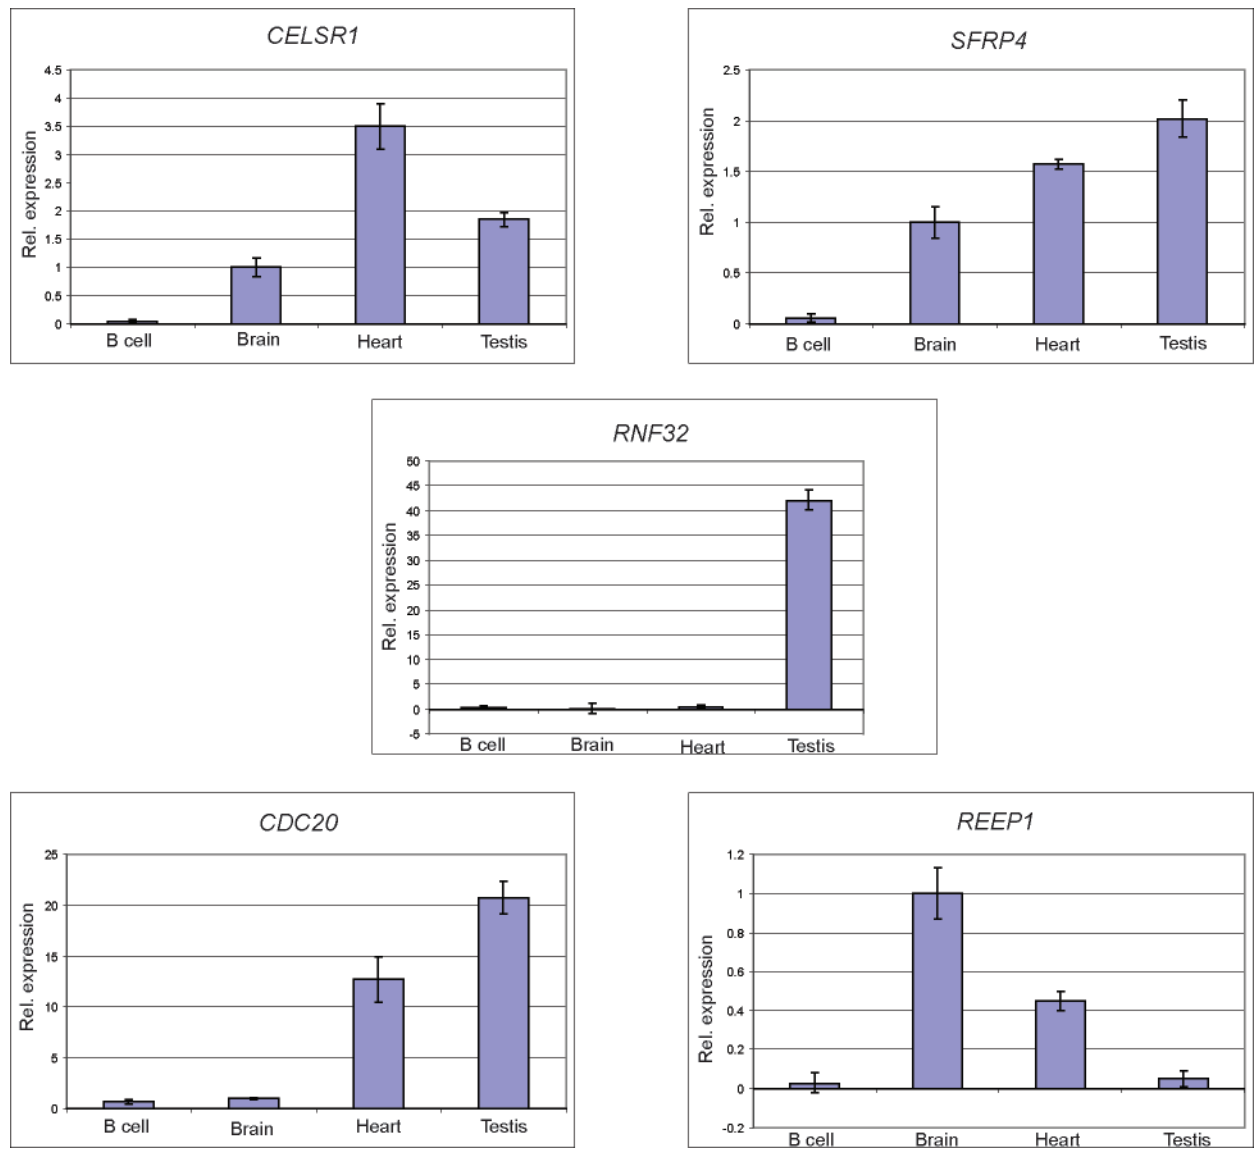

**Fig. S9.** RT-PCR analysis of promoter-methylated genes. Five genes methylated at their promoters in B cells were analyzed by real-time RT-PCR. These genes (*CELSR1*, *SFRP4*, *RNF32*, *CDC20*, and *REEP1*) are expressed at very low levels in B cells but are expressed substantially in brain, heart, or testis.

## Chromosome 3

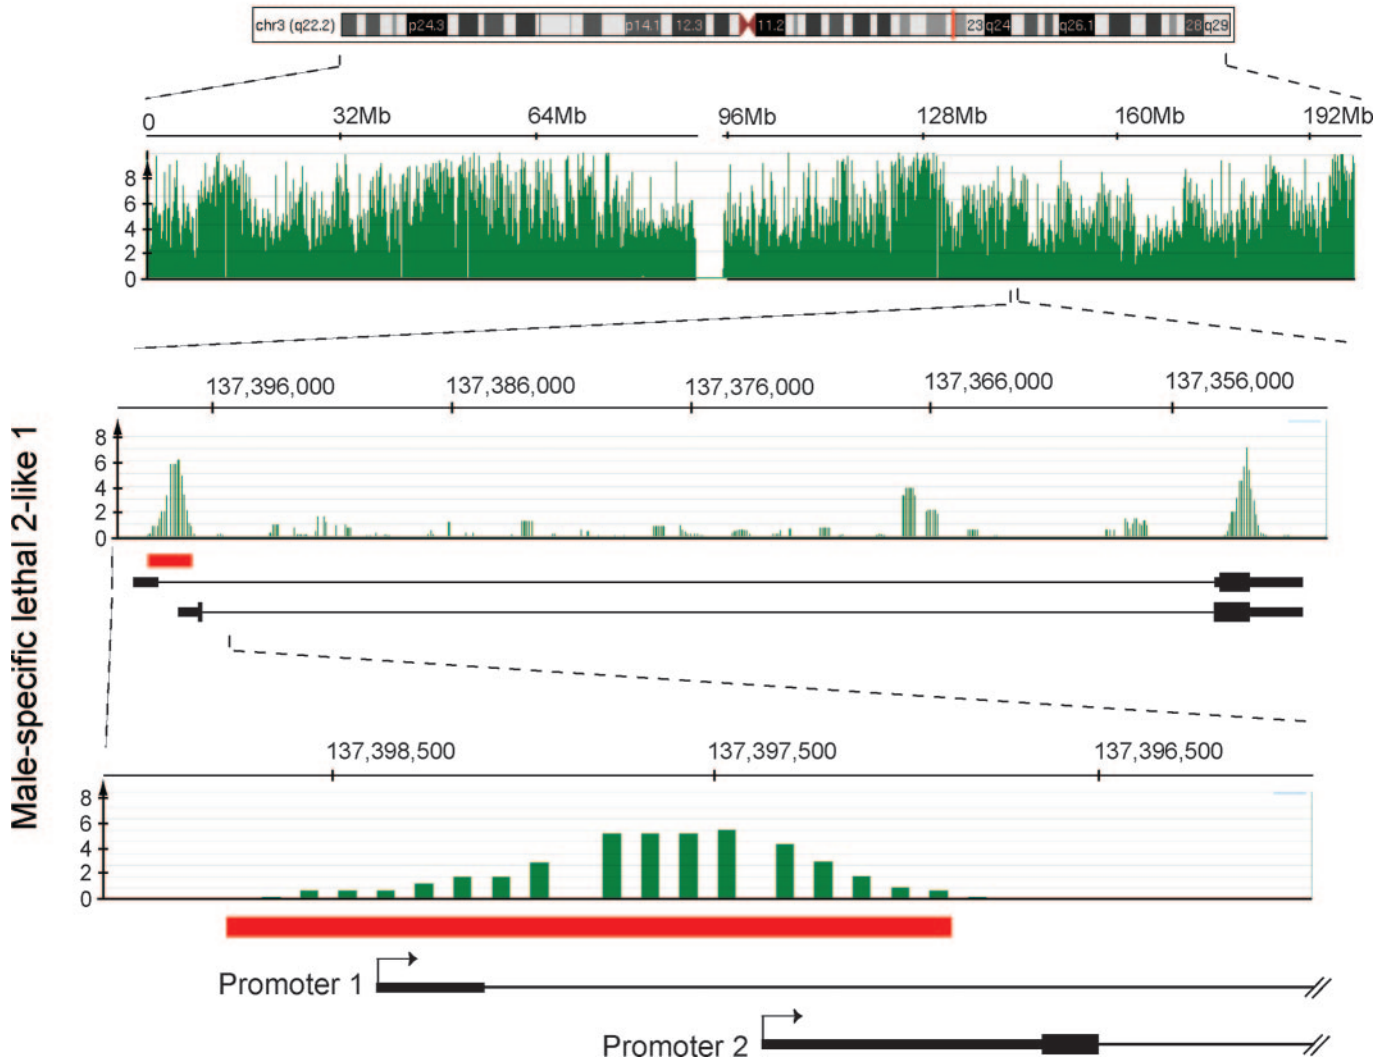

**Fig. S10.** Expression of the methylated male-specific lethal 2-like 1 gene is explained by alternative promoter usage. The methylation profile is in green, and the red box indicates a methylated CpG island associated with the 5' end of this gene. The gene is expressed in B cells according to expression microarray databases. Promoter 2 is highly methylated. Using 5'-RACE, we identified an alternative transcript that emanates from an undermethylated region of the CpG island (promoter 1).

## Chromosome 8

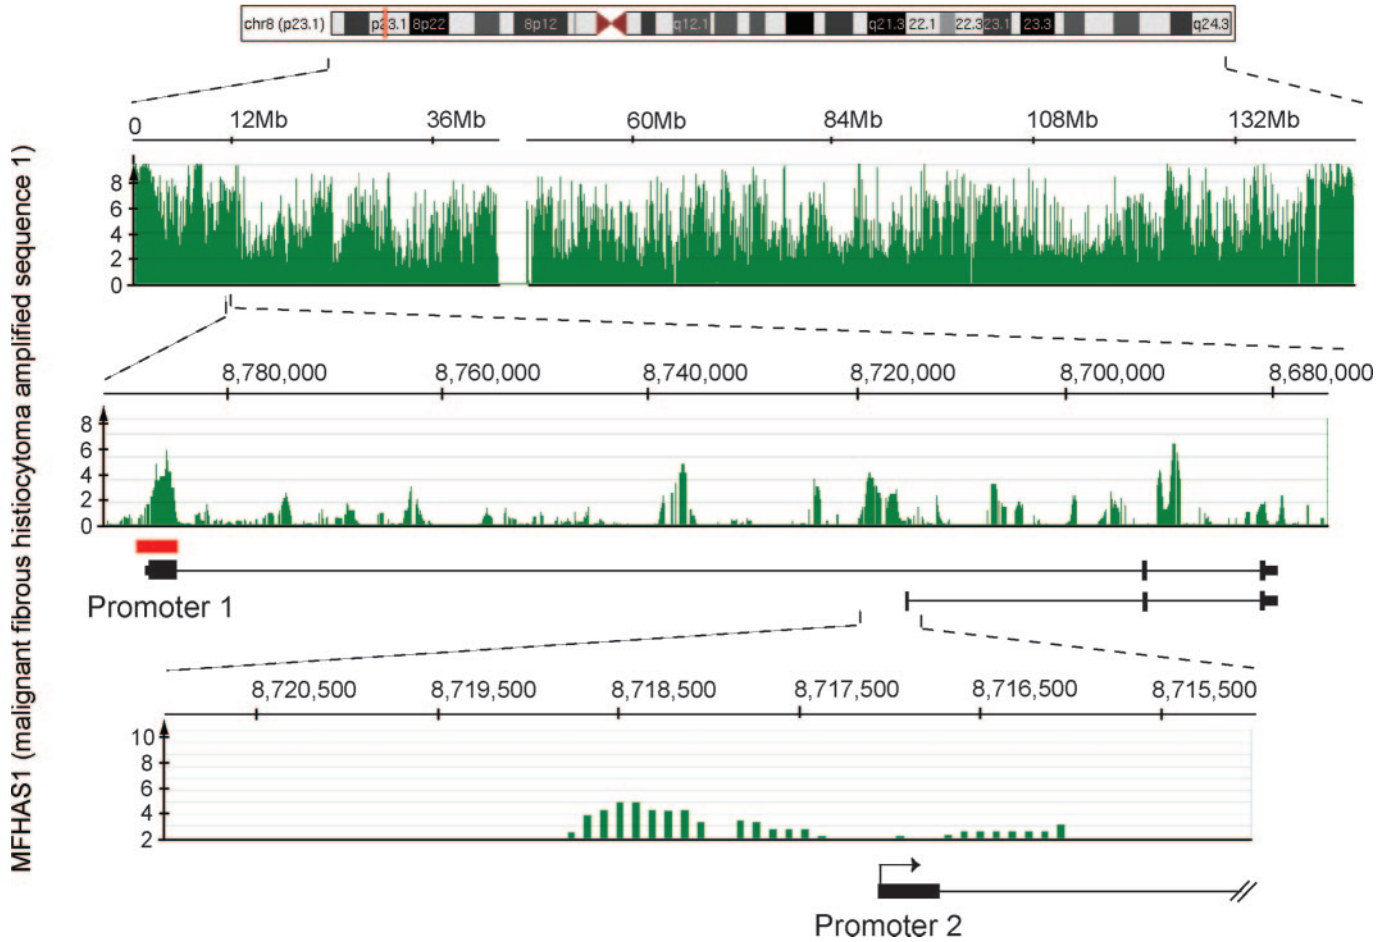

**Fig. S11.** Expression of the methylated *MFHAS1* gene is explained by alternative promoter usage. Data for the *MFHAS1* gene are shown. The methylation profile is in green, and the red box indicates a methylated CpG island associated with promoter 1. The gene is expressed in B cells according to expression microarray databases. Using 5'-RACE, we identified an alternative transcript that emanates from an unmethylated promoter (promoter 2).

Table S1. Peak summary

| Chromosome | No. of MRIs* | Chromosome length | Probe coverage | % Coverage | Methylated† | % Methylated |
|------------|--------------|-------------------|----------------|------------|-------------|--------------|
| chr1       | 3,219        | 247,249,719       | 114,350,500    | 46.25      | 1,929,456   | 1.69         |
| chr2       | 3,950        | 242,951,149       | 126,623,400    | 52.12      | 2,381,662   | 1.88         |
| chr3       | 2,240        | 199,501,827       | 100,243,800    | 50.25      | 1,317,996   | 1.31         |
| chr4       | 2,829        | 191,273,063       | 94,850,500     | 49.59      | 1,769,971   | 1.87         |
| chr5       | 2,746        | 180,857,866       | 91,535,000     | 50.61      | 1,710,863   | 1.87         |
| chr6       | 2,595        | 170,899,992       | 87,608,200     | 51.26      | 1,558,995   | 1.78         |
| chr7       | 2,684        | 158,821,424       | 79,698,100     | 50.18      | 1,672,219   | 2.10         |
| chr8       | 2,145        | 146,274,826       | 73,138,600     | 50.00      | 1,507,987   | 2.06         |
| chr9       | 1,348        | 140,273,252       | 61,475,900     | 43.83      | 763,946     | 1.24         |
| chr10      | 2,118        | 135,374,737       | 69,473,900     | 51.32      | 1,314,458   | 1.89         |
| chr11      | 1,951        | 134,452,384       | 66,295,300     | 49.31      | 1,117,955   | 1.69         |
| chr12      | 1,983        | 132,349,534       | 64,957,800     | 49.08      | 1,196,696   | 1.84         |
| chr13      | 1,906        | 114,142,980       | 51,347,600     | 44.99      | 1,230,765   | 2.40         |
| chr14      | 1,110        | 106,368,585       | 45,427,900     | 42.71      | 672,916     | 1.48         |
| chr15      | 854          | 100,338,915       | 42,605,200     | 42.46      | 503,248     | 1.18         |
| chr16      | 1,573        | 88,827,254        | 39,836,400     | 44.85      | 957,833     | 2.40         |
| chr17      | 1,436        | 78,774,742        | 40,469,400     | 51.37      | 810,637     | 2.00         |
| chr18      | 706          | 76,117,153        | 40,769,300     | 53.56      | 456,164     | 1.12         |
| chr19      | 1,544        | 63,811,651        | 23,691,600     | 37.13      | 804,685     | 3.40         |
| chr20      | 707          | 62,435,964        | 30,194,500     | 48.36      | 391,222     | 1.30         |
| chr21      | 538          | 46,944,323        | 18,295,000     | 38.97      | 320,232     | 1.75         |
| chr22      | 1,083        | 49,691,432        | 17,943,600     | 36.11      | 679,994     | 3.79         |
| chrX       | 1,094        | 154,913,754       | 61,022,300     | 39.39      | 732,435     | 1.20         |
| chrY       | 485          | 57,772,954        | 9,618,100      | 16.65      | 379,048     | 3.94         |
| Total      | 42,844       | 3,080,419,480     | 1,451,471,900  | 47.12      | 26,181,383  | 1.80         |

\*For definition of MRI, see Table 1 and main text.

†The number is the sum of the length of all identified MRIs on each chromosome.

**Table S2. Broad MRIs (>10 kb)**

| Chromosome | Location | Start       | End         | Length | Ratio | Features                                                            |
|------------|----------|-------------|-------------|--------|-------|---------------------------------------------------------------------|
| chr4       | 4P16.1   | 8,935,462   | 8,979,842   | 44,381 | 6.54  | USP17, segmental duplication                                        |
| chr8       | 8P23.3   | 1,328,022   | 1,343,471   | 15,450 | 8.34  | Many small CpG islands, simple tandem repeat, segmental duplication |
| chr4       | 4q36.2   | 188,117,137 | 188,131,786 | 14,650 | 6.36  | Large CpG island, simple tandem repeat, also segmental duplication  |
| chr7       | 7q22.1   | 100,420,733 | 100,434,982 | 14,250 | 4.14  | Simple tandem repeat, also segmental duplication                    |
| chr15      | 15q26.3  | 100,110,103 | 100,123,352 | 13,250 | 6.11  | Simple tandem repeat, also segmental duplication                    |
| chr14      | 14q32.33 | 104,766,142 | 104,778,791 | 12,650 | 16.00 | Intron of BRF1, simple tandem repeat, segmental duplication         |
| chr8       | 8p23.1   | 12,023,169  | 12,035,492  | 12,324 | 4.69  | Segmental duplication                                               |
| chr1       | 1q21.3   | 150,542,395 | 150,553,167 | 10,773 | 4.35  | FLG exon, simple tandem repeat, segmental duplication               |
| chr3       | 3q29     | 196,990,413 | 197,000,862 | 10,450 | 3.39  | MUC4 exon, simple tandem repeat, segmental duplication              |
| chrX       | Xp22.31  | 9,332,329   | 9,342,619   | 10,291 | 5.17  | Simple tandem repeat, segmental duplication                         |
